# Supplementary material for: Enhanced Hydrogen Evolution Reactivity of T’-Phase Tungsten Dichalcogenides (WS2, WSe2, and WTe2) Materials: A DFT Study
Source: MDPI journal article supplement (doi:10.3390/ijms231911727), 2022-10-03
Supplement: s1 [file s1]

## Supporting Information

# Enhanced hydrogen evolution reaction activity of T'-phase tungsten dichalcogenides (WS<sub>2</sub>, WSe<sub>2</sub>, and WTe<sub>2</sub>) materials by defect engineering

Haihua Huang <sup>1</sup>, Guowei Hu <sup>1</sup>, Chengchao Hu <sup>1</sup> and Xiaofeng Fan <sup>2,\*</sup>

<sup>1</sup> School of Materials Science and Engineering, Liaocheng University, Liaocheng 252059, China

<sup>2</sup> College of Materials Science and Engineering, Jilin University, Changchun 130012, China

\* Correspondence: xffan@jlu.edu.cn

Table S1. Hydrogen adsorption energy ( $E_{\text{ads}}$ ) of T'-WS<sub>2</sub>, T'-WSe<sub>2</sub> and T'-WTe<sub>2</sub> with stable various defect configurations at different adsorption positions.

|                 | Defect | Sites  | $E_{\text{ads}}$<br>(eV) |                  | Defect          | Sites  | $E_{\text{ads}}$<br>(eV) |                  | Defect          | Sites  | $E_{\text{ads}}$<br>(eV) |
|-----------------|--------|--------|--------------------------|------------------|-----------------|--------|--------------------------|------------------|-----------------|--------|--------------------------|
| WS <sub>2</sub> | V1     | -      | -                        | WSe <sub>2</sub> | V1              | -      | -                        | WTe <sub>2</sub> | V1              | -      | -                        |
|                 |        | -      | -                        |                  |                 | -      | -                        |                  |                 | -      | -                        |
|                 | V2     | top-V  | -3.06                    |                  | V2              | top-V  | -3.10                    |                  | V2              | top-V  | -2.95                    |
|                 |        | top-S1 | -2.16                    |                  |                 | top-Se | -1.77                    |                  |                 | top-Te | -1.55                    |
|                 | DV1    | -      | -                        |                  | DV1             | -      | -                        |                  | DV1             | -      | -                        |
|                 |        | -      | -                        |                  |                 | -      | -                        |                  |                 | -      | -                        |
|                 | DV2    | top-V  | -2.96                    |                  | DV2             | top-V  | -3.01                    |                  | DV2             | top-v1 | -2.91                    |
|                 |        | top-S1 | -1.71                    |                  |                 | top-Se | -1.65                    |                  |                 | top-v2 | -2.51                    |
|                 | Bs     | top-B  | -3.09                    |                  | B <sub>Se</sub> | top-B  | -3.13                    |                  | B <sub>Te</sub> | top-B  | -3.04                    |
|                 |        | top-S1 | -2.33                    |                  |                 | top-Se | -1.84                    |                  |                 | top-Te | -1.62                    |
|                 | Cs     | top-C  | -3.14                    |                  | C <sub>Se</sub> | top-C  | -3.24                    |                  | C <sub>Te</sub> | top-C  | -3.23                    |
|                 |        | top-S2 | -2.24                    |                  |                 | top-Se | -1.79                    |                  |                 | top-Te | -1.68                    |
|                 | Ps     | top-P  | -2.89                    |                  | P <sub>Se</sub> | top-P  | -2.78                    |                  | P <sub>Te</sub> | top-P  | -2.69                    |
|                 |        | top-S2 | -2.20                    |                  |                 | top-Se | -1.83                    |                  |                 | top-Te | -1.68                    |

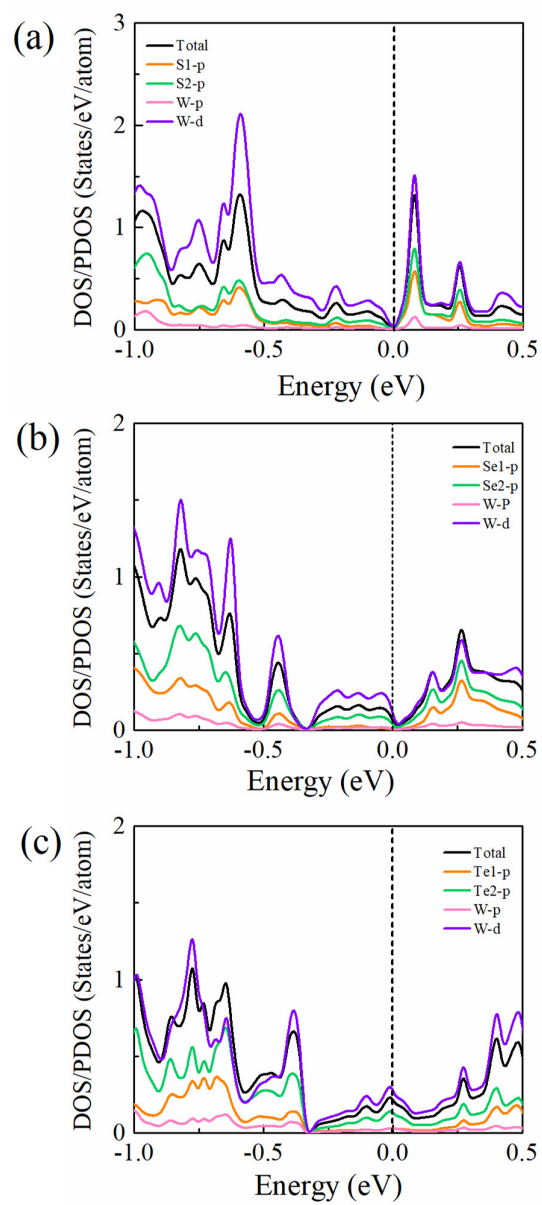

Figure S1. Electronic density of states of (a) T'-WS<sub>2</sub>, (b) T'-WSe<sub>2</sub> and (c) T'-WTe<sub>2</sub>, respectively. The vertical dot line denotes the fermi level.

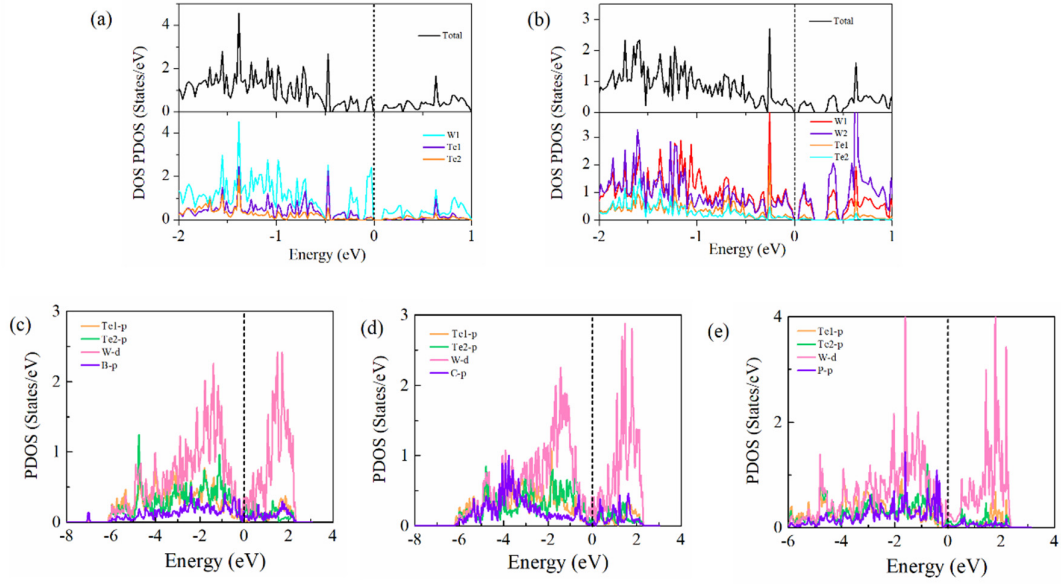

Figure S2. Density of states (DOS) and partial density of states (PDOS) of T'-WTe<sub>2</sub> monolayer with (a) single-vacancy (V), (b) double-vacancy (DV), (c) B-doping, (d) C-doping and (e) P-doping, respectively. The vertical dotted line denotes the fermi level.

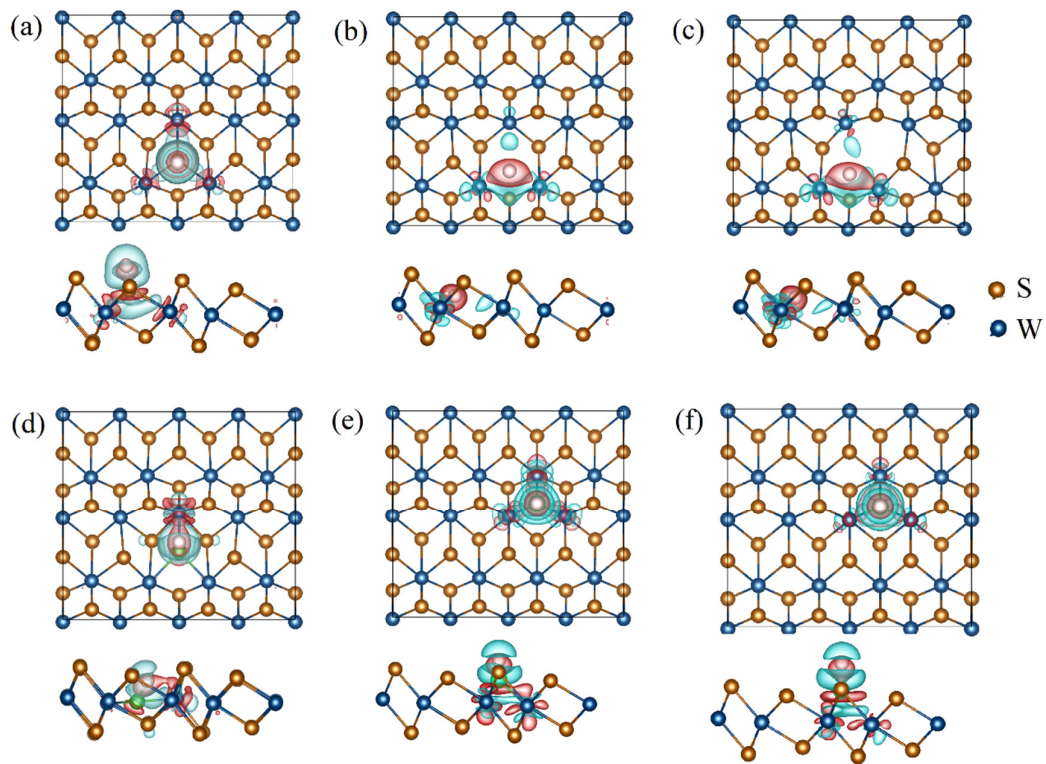

Figure S3. Difference of charge density of  $\text{WS}_2$  with H-adsorption system for (a) pristine, (b) single-vacancy, (c) double-vacancy, (d) B-doping, (e) C-doping and (f) P-doping from top and side view, respectively. Note that red color indicates charge accumulation and green color denotes charge depletion.

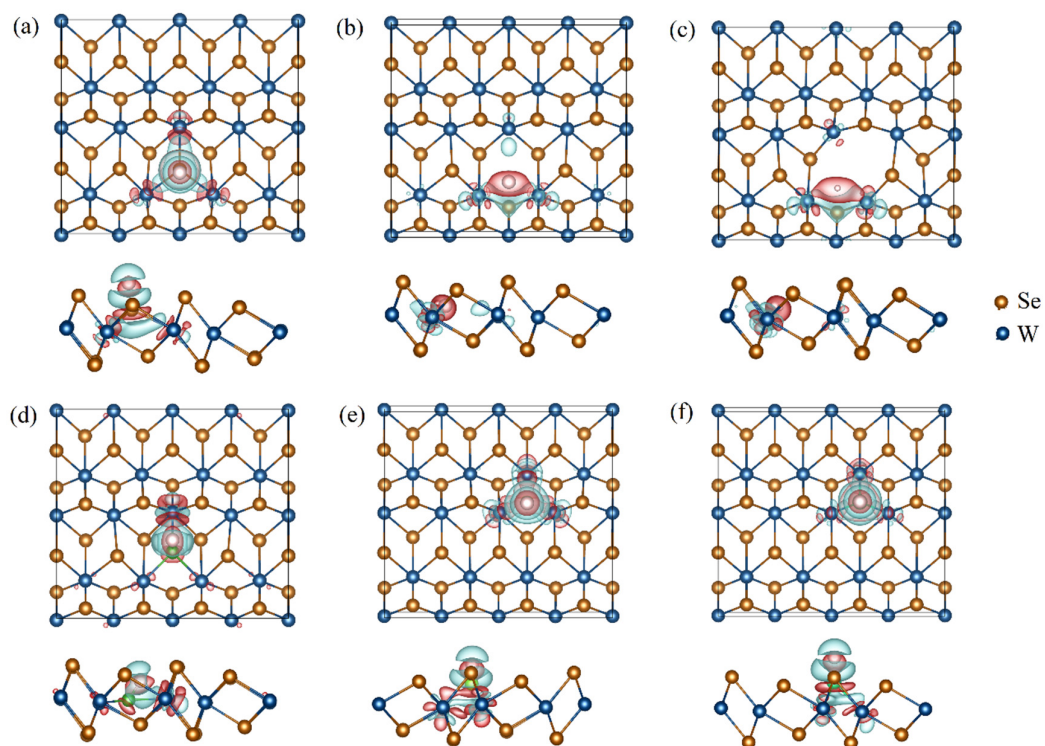

Figure S4. Difference of charge density of WSe<sub>2</sub> with H-adsorption system for (a) pristine, (b) single-vacancy, (c) double-vacancy, (d) B-doping, (e) C-doping and (f) P-doping from top and side view, respectively. Note that red color indicates charge accumulation and green color denotes charge depletion.
